# Supplementary material
Source: publisher figshare collection journal article supplement (https://sage.figshare.com/ndownloader/files/15301004)
Supplement: Supplementary file 1 [file 15301004]

# Supplementary Material

Table S.1 – Ankle joint range of motion, peak net moment, and angular velocities over stance. Instantaneous net ankle joint power = (moment\*angular velocity) was integrated to obtain ankle positive/negative work reported in the main manuscript. PRE=pre-training, POST=post-training, FU1=1-month follow up, FU5=5-month follow up, AB=Able-bodied runners from Fukuchi, et al (2017)<sup>8</sup>

| Visit | Run Speed (m/s) | Ankle Range of Motion (Deg) |       | Ankle Moment (Nm/kg) |          | Max Ankle Angular Velocity (Deg/sec) |         |              |         |
|-------|-----------------|-----------------------------|-------|----------------------|----------|--------------------------------------|---------|--------------|---------|
|       |                 |                             |       |                      |          | Plantarflexion                       |         | Dorsiflexion |         |
|       |                 | L                           | R     | L                    | R        | L                                    | R       | L            | R       |
| PRE   | 2.0-2.2         | 10(1)                       | 41(3) | 1.8(0.5)             | 1.7(0.6) | 105(23)                              | 301(55) | 124(6)       | 182(8)  |
| POST  | 1.9-2.2         | 11(1)                       | 34(3) | 2.8(0.4)             | 2.2(0.4) | 139(21)                              | 323(50) | 137(24)      | 172(29) |
| FU1   | 2.0-2.2         | 10(1)                       | 38(5) | 2.7(0.4)             | 2.3(0.3) | 113(10)                              | 374(32) | 177(24)      | 209(23) |
| FU5   | 2.0-2.1         | 15(1)                       | 34(5) | 3.3(0.3)             | 2.5(0.1) | 183(15)                              | 344(12) | 194(4)       | 172(4)  |
| AB    | 2.5             | 33(4)                       |       | 2.2(0.3)             |          | 392(41)                              |         | 252(53)      |         |

Table S.2 – Representative data illustrating the effect of varied strike index on ankle and foot work. Trial 1 and Trial 2 during PRE had 33% and 7% strike indices respectively, while Trial 3 during POST had a 40% strike index – firmly in the midfoot classification. Substantial variation exists between Trial 1 and Trial 2 in the work ratios for the ankle and foot when calculated separately, while a ratio of the summed ankle+foot work ( $WR_{AF}$ ) is relatively similar. Trial 3 at POST had even greater  $WR_{AF}$ , as the ankle contributed more work to the sum relative to the distal foot. This demonstrates that while rearfoot striking can yield relatively similar net  $WR_{AF}$  to midfoot striking, underlying ankle-foot work constituents can differ. Regardless, in a relative comparison, a midfoot strike was more effective as it yielded the greatest  $WR_{AF}$  magnitude in addition to low inter-cycle variability (Trial 3). This is likely due to the distal foot + PD-AFO footplate complex being less mechanically efficient than the ankle + PD-AFO strut complex, in terms of storing and returning elastic energy.

|                | PRE Trial 1 (3 minutes)<br>SI = 33% (rear-midfoot) |       |              | PRE Trial 2 (7 minutes)<br>SI = 7% (heel) |       |              | POST Trial 3 (7 minutes)<br>SI = 40% (midfoot) |       |              |
|----------------|----------------------------------------------------|-------|--------------|-------------------------------------------|-------|--------------|------------------------------------------------|-------|--------------|
|                | Ankle                                              | Foot  | A+F Sum      | Ankle                                     | Foot  | A+F Sum      | Ankle                                          | Foot  | A+F Sum      |
| +work (J/kg)   | 0.28                                               | 0.01  | <b>0.29</b>  | 0.10                                      | 0.11  | <b>0.21</b>  | 0.33                                           | 0.01  | <b>0.34</b>  |
| -work (J/kg)   | -0.19                                              | -0.25 | <b>-0.44</b> | -0.23                                     | -0.16 | <b>-0.39</b> | -0.25                                          | -0.17 | <b>-0.42</b> |
| work ratio (%) | 147%                                               | 4%    | <b>66%</b>   | 43%                                       | 69%   | <b>54%</b>   | 132%                                           | 6%    | <b>81%</b>   |
